# Supplementary material for: Mating-Type Locus Organization and Mating-Type Chromosome Differentiation in the Bipolar Edible Button Mushroom Agaricus bisporus
Source: MDPI journal article supplement (doi:10.3390/genes12071079), 2021-07-16
Supplement: s1 [file s1]

## Supplementary material

### **Mating-type locus organization and mating-type chromosomes in the bipolar edible button mushroom *Agaricus bisporus***

Marie Foulongne-Oriol<sup>1</sup>, Ozgur Taskent<sup>2</sup>, Ursula Kües<sup>3</sup>, Anton S. M. Sonnenberg<sup>4</sup>, Arend van Peer<sup>4</sup> and Tatiana Giraud<sup>2</sup>

<sup>1</sup> INRAE, MycSA, Mycologie et Sécurité des Aliments, 33882 Villenave d'Ornon, France

<sup>2</sup> Ecologie Systématique Evolution, Bâtiment 360, CNRS, AgroParisTech, Université Paris-Saclay, 91400 Orsay, France

<sup>3</sup> Molecular Wood Biotechnology and Technical Mycology, Büsgen-Institute and Goettingen Center for Molecular Biosciences (GZMB), University of Goettingen, Büsgenweg 2, 37077, Goettingen, Germany

<sup>4</sup> Plant Breeding, Wageningen University and Research, Droevendaalsesteeg 1, 6708 PB Wageningen, The Netherlands

## A

|      |                                                                           |     |
|------|---------------------------------------------------------------------------|-----|
| a1-1 | MTVSSIRK-----RLIQAEESFLAASNER--FMEDFEQTWNILAVDIVKATSANQMSPEDKSLADIV       | 60  |
| a1-2 | MTISSIRK-----RLIHAEEESFLAAKNDH--LMEDFEYAWTSLAVDIMKATSANQMTQEDIALADAV      | 60  |
| b1-1 | MSTRSSRKTVKQSLCRRFSDAESAFLDALDVGGGAMTAFEFEWHLRDDFEAACIQGDVDPETASYARLV     | 70  |
| a1-1 | SSRITSLCKTFIDLTYPCCDISLSSEQELERILEEHESGNHGSQSRSEETLHPAPALYIKQAYSWLMQN     | 130 |
| a1-2 | SSRITSLCKTFVEFTNACDISLSFEQDLERILEEHDHGNHCSNHYSSEEMPRPAPAPYIKQAYSWLQVN     | 130 |
| b1-1 | TYRIAELISSSFLKEATCKQLTDSLMDLASIPELRQS----QVLDTPQETISSR--RDVSLAAEWLSKN     | 134 |
| a1-1 | LSNPYPKPKEVREAIARKAGSDPKHVENWFGDVRKRMGWNGIRKRHFENKRHLTVAAATAFFGGQSSELLT   | 200 |
| a1-2 | LSNPYPKPKEVREAIARKAGSDPKHVENWFGDARKRMGWNGIRKRHFENKRRLTVAAATAFFGGQSSELLT   | 200 |
| b1-1 | FFNPYPSSSTVDRISHQSNWNRKDVDAWFEARRRIGWNDIRKQYFONKRAGAVERATEFFNG-SPTCFD     | 203 |
| a1-1 | DLVRQDFAFMSADAEDMYSKKFMESKLARHIAGVTGSPRKKPSQSAS-VENETSSSYNHP-----         | 259 |
| a1-2 | DPVRQDFAFMSADAEDMYSKKFMESKLARHIAGVTESPRKKRSQSAS-VEGGSSSSFNYS-----         | 259 |
| b1-1 | AVLSQAFIDMESRVQDLYVEPYKPSKLAVVLG-----KGHSDEAAFMOKGCFSTPEKSPRTLSPSRSL      | 267 |
| a1-1 | -----LFHPSLPHTOCNA-RKRFRSLDSTDEVLDINNFOKRPRFSYSGDSSPAASHSPLPSTSPQSPVP     | 322 |
| a1-2 | -----LFHPSLPHTOCNP-RKRFRSLDLDTDVLDK---KKRRLSYSGDSSPAALHSPLPTTSPQSPVP      | 319 |
| b1-1 | TSSRSASPIDSSVSTCQTNKRKPRS-DKTDQYHSQHP-RKKLR-----EEEEPTTIM                 | 317 |
|      | <u>NLS</u> <u>NLS</u>                                                     |     |
| a1-1 | HAIPATFQMNROTSEFE---DHLPPSHPSADSRSV-SLSQVLELNRTSCNPSPSSSTLPSPDVSDEPITSQ   | 388 |
| a1-2 | HAIPATFQMNCOTSEFE---DHLSPRHPSADSRPA-SLSQVQDLNRTSCNASPSSYTLPDFVSDEPITSQ    | 385 |
| b1-1 | LQAQPTCSSVSQSSLEEVSDAIT-KGSSAVARPARSPRLSPFLDPQRKQLHEEALDLPNNAFGGSRITIR    | 386 |
| a1-1 | YIPNEATKRSDSVSMASFQOSP-TLHSSALSILHNTLPSSLSRKENTQFPTEFQAPVTYSEPVTQGF       | 457 |
| a1-2 | HIPNEDTKRSDLVSMASIROSS-ILHSPALSLPRNILPSSLSPRKENTQFPTEFQMPVPCSESVVTQGF     | 454 |
| b1-1 | SQTTSLGHQSNACTPMAPDLGSINPTLSLNFPSASSTIMPDLQVDFVHDISHAEI--SELSYTFPGP       | 454 |
| a1-1 | LAPSASDITHD-----TIFSGSTANDRFLAISSDFAPDLSSAQDVNATSWPATIANTQT-----          | 513 |
| a1-2 | LAPLASDVTHE-----TIFSGSTVNDRLFLSTSHLDFASRSPSSVQDVNATSWPGTIANTQI-----       | 510 |
| b1-1 | -----LTHDQPTLMQPVDPQWS-NSATS AHLPTYDLSMSLLELASQAMP PNGNTDVVPSSDIFNNCS     | 516 |
| a1-1 | --DGQFFGYLDPLPTEFTTFTAQVDALPDFADVDLTFGNLFDLDASAAFPSPDDEFDIT---ILPANRAENL  | 578 |
| a1-2 | --DGQFFGYLDPLPTEFTTFTAQVDALPDFADVDLSFGNLFDLDAASAAFPSPDDEFDIS---MLPVNRAENL | 575 |
| b1-1 | FYDDQLFELL-----RPFGRGAPAVPPMQNFQGLNTEVDISLAAPY---LDFESCTSQIPQPIDDI        | 576 |
| a1-1 | ATNDLFTLTP----AVESSVSKFLQLEQLKKHRNRIOEYINTLEIQIATTLAA                     | 627 |
| a1-2 | ATNDLLTLTP----AAENSVSKFLQLEQLKKHRNRIOEYINTLEIQIATTLAA                     | 624 |
| b1-1 | LADFIHNFSAAPPVDDAEK-LKRVAVHVEMLKREKEHLQERLOSLEYVSLPLVINKRLT               | 631 |

## B

|      |                                                                        |    |
|------|------------------------------------------------------------------------|----|
| a2-1 | MPAFRISDECSQRNMGVAS-VLSVLRKALCTKTPLPHSATLPSLSNIQLPQAPSIAIVLKTHCVGQSLAE | 69 |
|------|------------------------------------------------------------------------|----|

```

b2-2  MSPKIQETQAILSSRVPSFNISRPALQFGGLSNSRRNNWTPPLQFPPTSPAAQLVQLGCAFEESQ 69
b2-1  MPLIDETP---ASIPHQRISDALSK 23

a2-1  ELTRTYEQHVSDLKCTEAPIQGLLQHYRDN-----VSSDIIEKQIARYISLYESRIKHWNLL 129
b2-2  EAANIFASRVKDLQSTYERHYEKILFRRLSKYSSNTELRNLAKHINRVLDARSRNITSWQEAILQAASIR 139
b2-1  SLSQSYQSKVNHVEVNFQKPRQVQYRLRQAPGESEQ--TPQATTVISGAYMIQLKTWESHTLKKIARR 91

a2-1  SNEIKREKS-----EENTERIPILMTYFKHNAYPSIDDRNWLARETENTPQOIGLWFONRRRRSRKAGV 193
b2-2  VQERLKQASSDERPVEKPEWTPFLKKYFAQNAYPTHQDKVILATKTGMTVROIYDWFQNHRTREKRKGI 209
b2-1  LRK-NRCIEPTCKPSEKYEVVPLLNSYFKRNAYPSTSDRASLAKKTNMSROIEVWFQNHNRRAHKNQ 160
-----

a2-1  ELKRAGPDEISPNLFADDEEPYSPOPGTRPRVSSPEVT-TVEEVPLSCSSVDATLRSHOHLRTHDFTN 262
b2-2  PLKRPDIEGSPEFSSEDSPTSRVTTPEDDDMLPKKRR-VATDEPLALSPVESTSTQDFDFFCLPPDAVW 278
b2-1  ILNRVKDQQLPSDALPDEPPERSSTPPKNSHSSRKCLSHSPSSSIQAPASPLSPTQCQSPPSIFSATCV 230

a2-1  FELPP-YAFPTYNHEATPSCWSRPPETPFPEPNWDRK-----PSSHRKNRHARSTATSVDD 318
b2-2  PRSYSEKDMKAFWECFVEPNLGSFTWPRELQPDSRSK-----RKALDSNIDEQIAESFASK 335
b2-1  QTISSTSKSSPLPEPLEYAFPPAFPRACDDDTFAIKGKDPWFPFAPQWIRLPAQTINVRKRKRRTISIDE 300

a2-1  LSLMLAVKLRIFCNHFSSSAVADTPWHAT-LYHTSPSPLPPALVRSKQFVIITIGPTSQSIRSSLKRKRS 387
b2-2  LHFRSSLCKRTSLECEETSDIFEPWSYHRLYPKRHPASVYNQLTEPSKCAQPARPTELFPKYRRTLNS 405
b2-1  FAVEFAQHLSCRHLCSEPSASKKKRSSWRDATHVYPCRGHPADLGQYQQKASLESSHHSPRHHSRPS 370

a2-1  EINEEQCTKRFRFSASSCSSFIGGDFYSSDDSSCTSSSPGPQTTPPSAHLSLPTPPRFVDWSKFSIPTV 457
b2-2  SPSSRRRASSSSSHSTCSISSSTSPSSSIASSPPSMIRCSWSSLDTFTPGSSPRRPLQSLGISGLKGF 475
b2-1  ISSRRSSHTCMPSGSESSVSTVSSPSSFDSTPLTSLDASPLLLPQNDKAYASESSLSVQLQSLMLPGF 440

a2-1  PQAYGSC 464
b2-2  EVYAGPFVGLNMSISS 491
b2-1  LQYAGSSVKFGTAVS 455

```

**Supplementary Figure S1** Alignment of **A. HD1** and **B. HD2** proteins from *Agaricus bisporus* var. *bisporus* H97 and *A. bisporus* var. *burnettii* JB137-S8. The positions of the homeodomains are marked by a dashed line. NLS marks motifs of alike structure of the bipartite nuclear localisation signals in *Coprinopsis cinerea* (Spit *et al.*, 1998) and *Laccaria bicolor* (Niculita-Hirzel *et al.*, 2008).

**A**

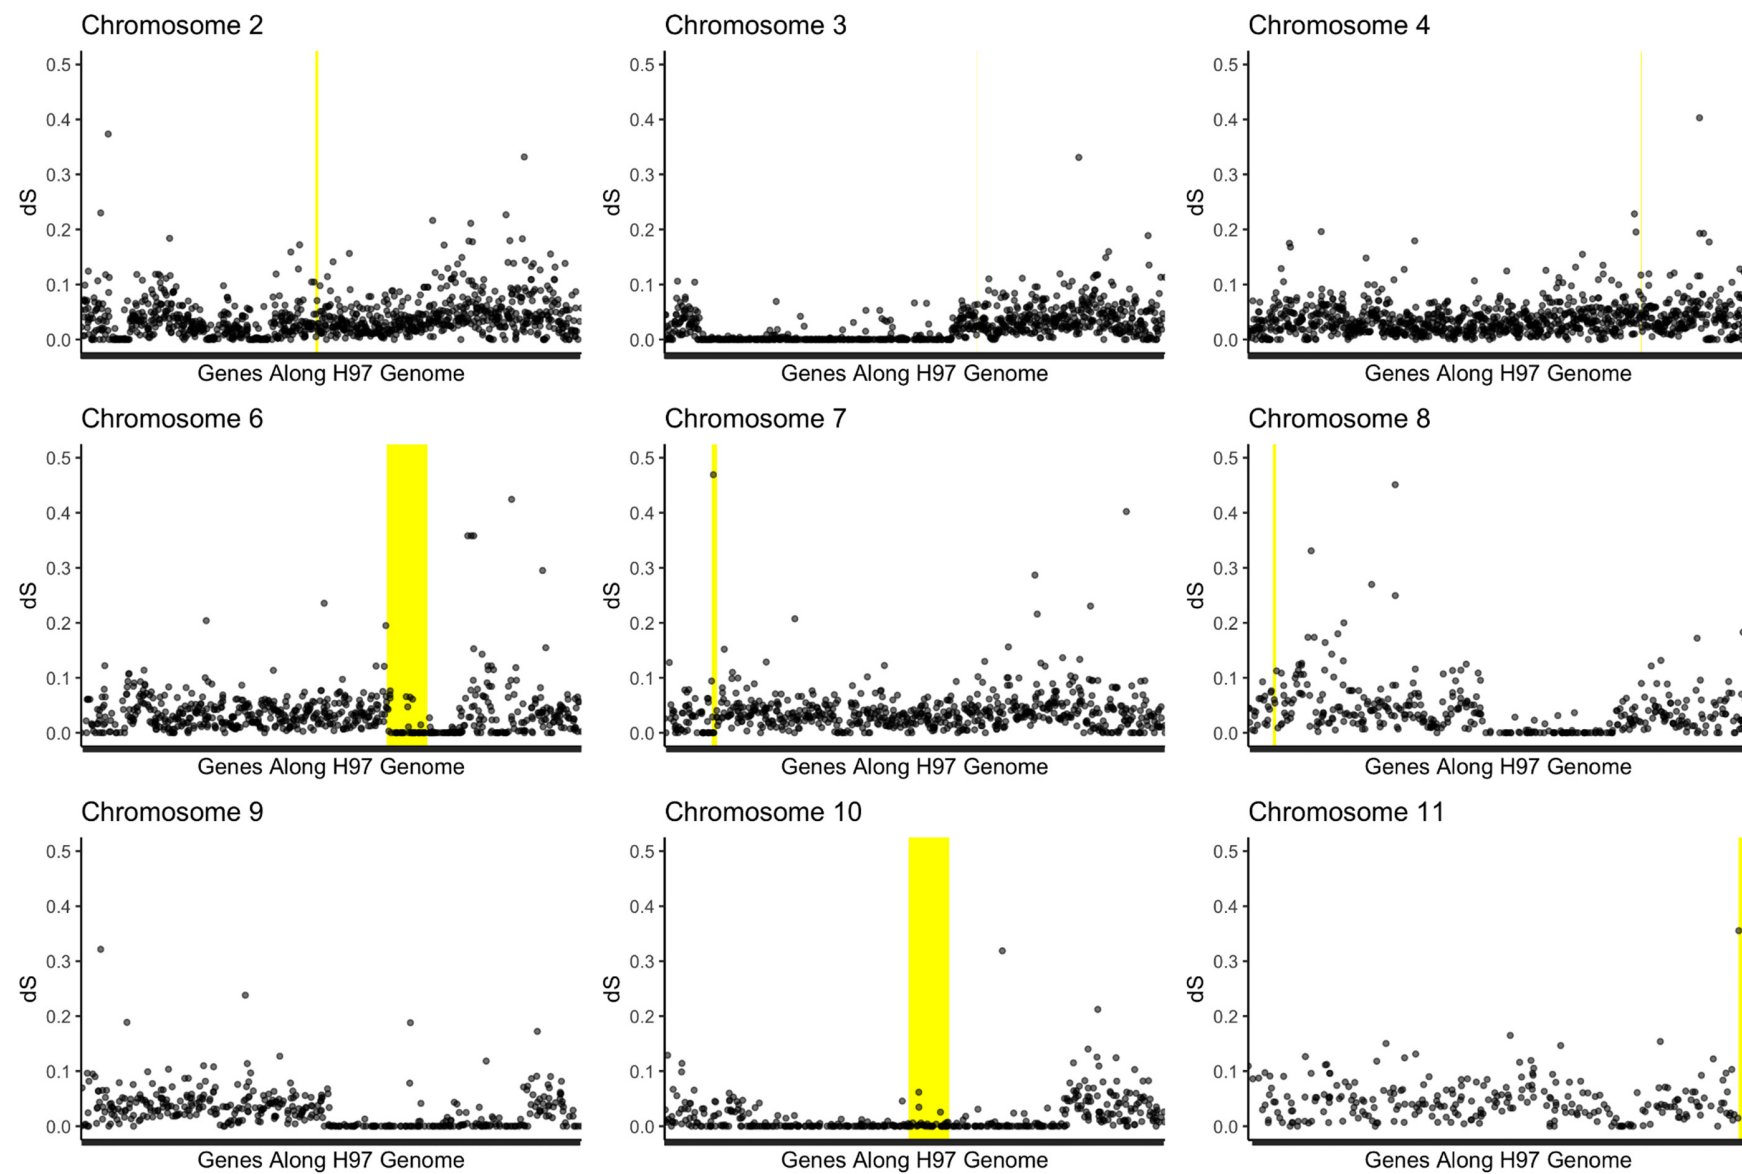

**B**

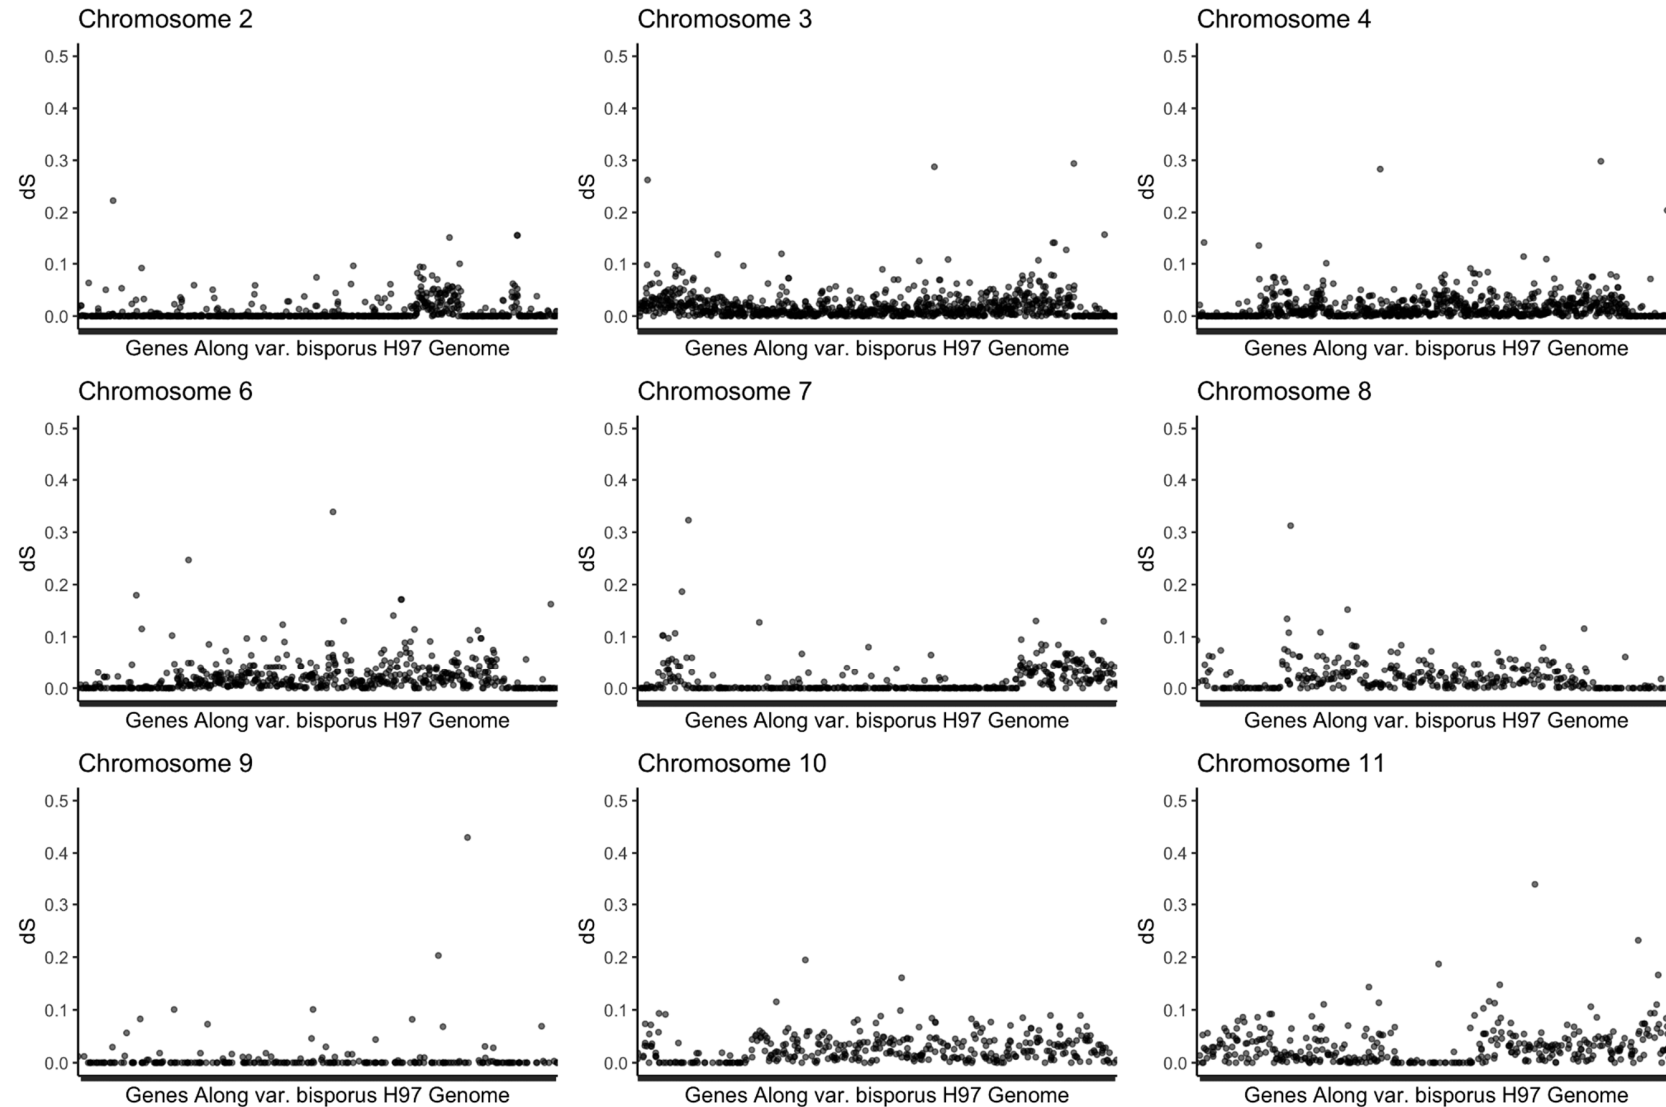

**Supplementary Figure S2.** Synonymous substitution rates between the homokaryotic genomes of *Agaricus bisporus* var. *bisporus* H97 and H39 (A) and between *A. bisporus* var. *burnettii* H119p1 and H119p4 (B). Y-axis shows the synonymous divergence levels between the alleles found in the homokaryotic genomes of H97 and H39 of alternative mating types, issued from the U1 cultivar. X-axis shows the gene order along the H97 genome. Yellow highlights on the background shows the putative centromeric regions. The other chromosomes are shown in Figure 8.

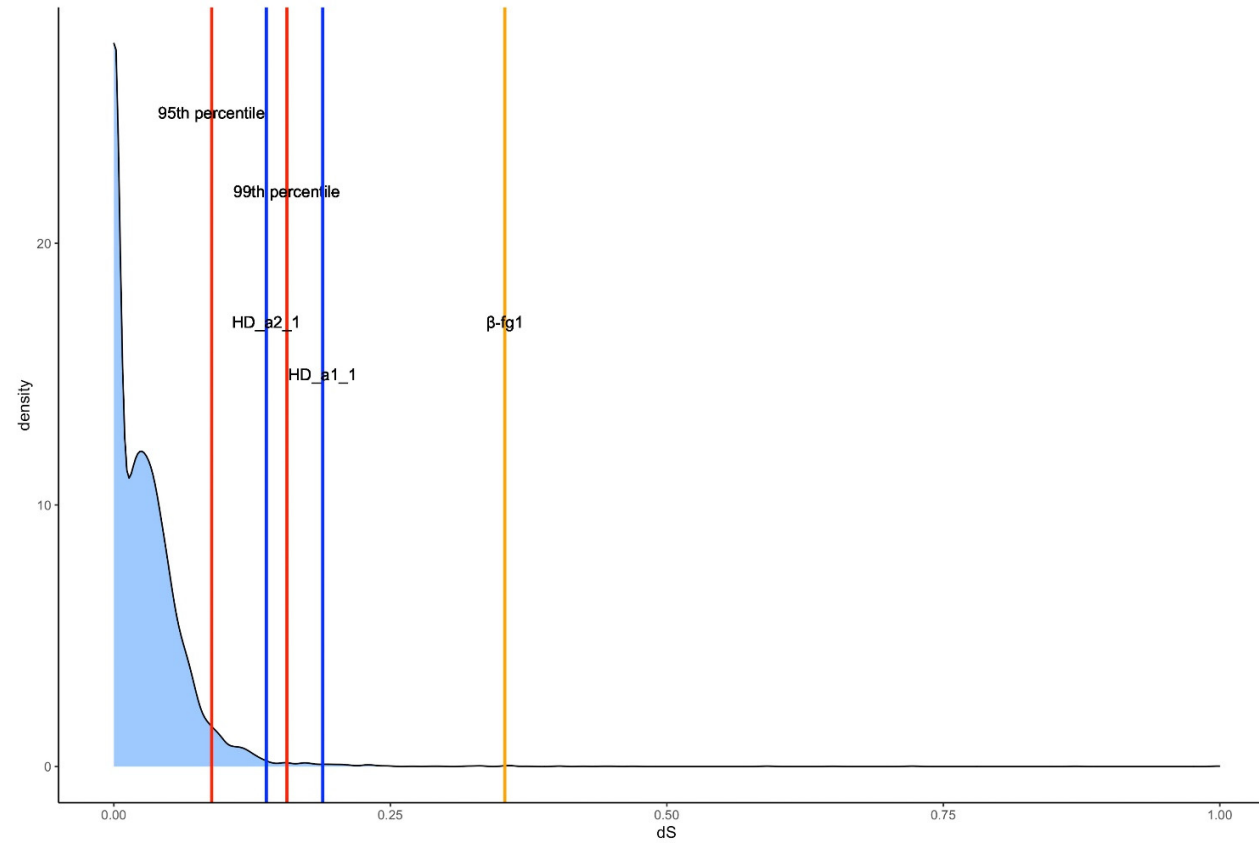

**Supplementary Figure S3.** Distribution of the rate of synonymous substitutions (dS) between orthologous gene pairs found in the constitutive homokaryon genomes of H97 and H39 of *Agaricus bisporus* var. *bisporus* Hurst U1. Density plot shows the relative frequencies of genes with different dS values. The 95<sup>th</sup> and 99<sup>th</sup> percentile values of the distribution are highlighted with vertical red lines. The dS values for the two *HD* genes and  *$\beta$ -fg1* gene are shown with blue and orange vertical lines, respectively.

**Supplementary Table S1 : Gene comparison between *Agaricus bisporus* var *bisporus* H97 v3.0 and *Agaricus bisporus* var *burnettii* JB137-S8: genomic position in the two strains, DNA identity and protein identity**

| <i>Agaricus bisporus</i> var <i>bisporus</i> H97 v3.0 |                                                 | <i>Agaricus bisporus</i> var <i>burnettii</i> JB137-S8 |                                                | DNA identity (%)     |                 | Protein identity (%) |
|-------------------------------------------------------|-------------------------------------------------|--------------------------------------------------------|------------------------------------------------|----------------------|-----------------|----------------------|
| Gene ID/name                                          | Position (start to stop codon)                  | Gene ID/name                                           | Position (start to stop codon)                 | Genomic DNA          | Coding sequence |                      |
| 239372/ <i>mip1</i>                                   | <a href="#">scaffold_1:897420-899760</a> (+)    | 67360/ <i>mip1</i>                                     | <a href="#">scaffold_1:2040314-2042755</a> (-) | 98                   | 98              | 99                   |
| 113833/ <i>a1-1</i>                                   | <a href="#">scaffold_1:895062-897100</a> (+)    | 124448/ <i>a1-2</i>                                    | <a href="#">scaffold_1:2043142-2045173</a> (-) | 88                   | 89              | 82                   |
| 239365/ <i>a2-1</i>                                   | <a href="#">scaffold_1:893233-894863</a> (-)    | 144391/remnant of <i>a2-2</i>                          | <a href="#">scaffold_1:2045374-2045559</a> (+) | 77                   | -*              | -                    |
| -                                                     | -                                               | 144392/footprint of a <i>mip1</i> gene                 | <a href="#">scaffold_1:2045600-2045806</a> (-) | (77 to <i>mip1</i> ) | -*              | -                    |
| -                                                     | -                                               | 144356/ <i>b1-1</i>                                    | <a href="#">scaffold_1:2080256-2082318</a> (-) | -                    | -               | -                    |
| 239364/ <i>b2-2</i>                                   | <a href="#">scaffold_1:890959-892499</a> (-)    | 124456/ <i>b2-1</i>                                    | <a href="#">scaffold_1:2082520-2084040</a> (+) | -                    | -               | 26                   |
| 1181595/ $\beta$ - <i>fg2</i>                         | <a href="#">scaffold_1:887425-889480</a> (+)    | 144375/ $\beta$ - <i>fg2</i>                           | <a href="#">scaffold_1:2084717-2086770</a> (-) | 98                   | 99              | 98                   |
| 1137415/ $\beta$ - <i>fg1</i>                         | <a href="#">scaffold_1:883864-884895</a> (+)    | 81839/ $\beta$ - <i>fg1</i>                            | <a href="#">scaffold_1:2087937-2088968</a> (-) | 94                   | 96              | 98                   |
|                                                       |                                                 |                                                        |                                                |                      |                 |                      |
| 239575/ <i>ph11</i>                                   | <a href="#">scaffold_1:2918372-2918506</a> (+)  | 144336/ <i>ph11</i>                                    | <a href="#">scaffold_1:59978-60141</a> (-)     | 99                   | 99              | 98                   |
| 239576/ <i>ph12</i>                                   | <a href="#">scaffold_1:3231293-3231622</a> (+)  | 144361/ <i>ph12</i>                                    | <a href="#">scaffold_14:29026-29157</a> (+)    | 100                  | 100             | 100                  |
| 239578/ <i>ph13</i>                                   | <a href="#">scaffold_1:3236723-3236857</a> (-)  | 144359/ <i>ph13</i>                                    | <a href="#">scaffold_14:34681-34815</a> (-)    | 99                   | 99              | 98                   |
| 239573/ <i>ph14</i>                                   | <a href="#">scaffold_5:200825-200999</a> (-)    | 86158/ <i>ph14</i>                                     | <a href="#">scaffold_9:175788-175616</a> (-)   | 97                   | 97              | 96                   |
|                                                       |                                                 |                                                        |                                                |                      |                 |                      |
| 239579/ <i>ste3.1</i>                                 | <a href="#">scaffold_5:2047209-2048830</a> (-)  | 121275/ <i>ste3.1</i>                                  | <a href="#">scaffold_7:898975-900596</a> (-)   | 98                   | 99              | 97                   |
| 239590/ <i>ste3.2</i>                                 | <a href="#">scaffold_13:276835-278479</a> (+)   | 144367/ <i>ste3.2</i>                                  | <a href="#">scaffold_17:267571-269202</a> (+)  | 98                   | 98              | 98                   |
| 239584/ <i>ste3.3</i>                                 | <a href="#">scaffold_13:392785-394687</a> (+)   | 144363/ <i>ste3.3</i>                                  | <a href="#">scaffold_17:379554-381458</a> (+)  | 98                   | 98              | 98                   |
| 195352/ <i>ste3.4</i>                                 | <a href="#">scaffold_12:1236632-1238485</a> (-) | 123419/ <i>ste3.4</i>                                  | <a href="#">scaffold_38:95442-97029</a> (+)    | 96                   | 97              | 98                   |

\*contains frameshift(s) and stop codon(s)

**Supplementary Table S2: Microsynteny analysis performed by tblastn searches on JGI page <http://genome.jgi-psf.org/Copci1/Copci1.home.html> (settings: default) with genes of the regions with *HD* mating type genes on the chromosomes 1 of *Agaricus bisporus* var. *bisporus* H97 (scaffold 1) compared to the genome of *Coprinopsis cinerea* Okayama 7 (no hit: -)**

| <i>Agaricus bisporus</i> var. <i>bisporus</i> H97 |                                      | <i>Coprinopsis cinerea</i> Okayama 7 |                                     |
|---------------------------------------------------|--------------------------------------|--------------------------------------|-------------------------------------|
| Gene                                              | Position on chromosome I             | Gene                                 | Position on chromosome I            |
| 189405 ( <i>pab1</i> )                            | <a href="#">932956-935538</a><br>(-) | CC1G_01849T0<br>( <i>pab1</i> )      | <a href="#">2699003-2701362</a> (-) |
| 1165947                                           | <a href="#">931452-932725</a><br>(-) | -                                    | -                                   |
| 1120398 ( <i>up1</i> )                            | <a href="#">930119-931431</a> (+)    | CC1G_01848T0                         | <a href="#">2697506-2698930</a> (+) |
| 1165946 ( <i>ubc12</i> )                          | <a href="#">928622-930005</a><br>(-) | CC1G_01847T0                         | <a href="#">2696166-2697285</a> (-) |
| 1072572                                           | <a href="#">928377-928937</a><br>(+) | CC1G_13707T0                         | <a href="#">2695644-2696187</a> (+) |
| 1153365 ( <i>up3</i> )                            | <a href="#">927132-928291</a><br>(-) | CC1G_01846T0                         | <a href="#">2694335-2695507</a> (-) |
| 1095010 ( <i>up4</i> )                            | <a href="#">924999-927074</a><br>(-) | CC1G_01845T0                         | <a href="#">2692021-2694125</a> (-) |
| 1072437 ( <i>up5</i> )                            | <a href="#">922378-924450</a><br>(-) | CC1G_13706T0                         | <a href="#">2689754-2691849</a> (-) |
| 1181608 ( <i>up6</i> )                            | <a href="#">919573-922217</a><br>(-) | CC1G_13705T0                         | <a href="#">2686968-2688467</a> (-) |
| 1145681 ( <i>glydh</i> )                          | <a href="#">915514-919100</a><br>(-) | CC1G_01843T0                         | <a href="#">2683012-2686558</a> (-) |
| 1153361 ( <i>up7</i> )                            | <a href="#">912956-915306</a><br>(+) | CC1G_01842T0                         | <a href="#">2680968-2682946</a> (+) |
| 1031411 ( <i>sec61</i> )                          | <a href="#">912405-912835</a><br>(-) | CC1G_01841T0                         | <a href="#">2680073-2680505</a> (-) |
| 1095004                                           | <a href="#">910403-912306</a><br>(+) | CC1G_01840T0                         | <a href="#">2678200-2679927</a> (+) |
| 1103173 ( <i>up8</i> )                            | <a href="#">906900-909825</a><br>(+) | CC1G_01839T0                         | <a href="#">2674086-2677215</a> (+) |
| 1165935 ( <i>up9</i> )                            | <a href="#">905234-906831</a><br>(+) | CC1G_01838T0                         | <a href="#">2672530-2673857</a> (+) |



|                          |                                      |                                             |                                     |
|--------------------------|--------------------------------------|---------------------------------------------|-------------------------------------|
| 1137419 ( <i>up10</i> )  | <a href="#">904507-905196</a><br>(-) | CC1G_01837T0                                | <a href="#">2671654-2672349</a> (-) |
| 1165933                  | <a href="#">902316-904458</a><br>(-) | -                                           | -                                   |
| 1072561 ( <i>up11</i> )  | <a href="#">900667-902087</a><br>(-) | CC1G_01836T0                                | <a href="#">2669318-2671452</a> (-) |
| 239372 ( <i>mip1</i> )   | <a href="#">897420-899938</a><br>(-) | CC1G_01835T0<br>( <i>mip1</i> )             | <a href="#">2666417-2668995</a> (-) |
| 113833 ( <i>a1-1</i> )   | 895062-897100<br>(+)                 | CC1G_01834T0<br>( <i>a1-2</i> )             | 2666140-2664189 (+)                 |
| 239365 ( <i>a2-1</i> )   | 893233-894463<br>(-)                 | CC1G_01833T0<br>( <i>a2-2</i> )             | 2663799-2662251 (-)                 |
| -                        | -                                    | CC1G_01832T0                                | 2660867-2660048 (+)                 |
| -                        | -                                    | CC1G_01831T0<br>( <i>b1-2</i> )             | 2655981-2653848 (+)                 |
| 239364 ( <i>b2-2</i> )   | 890959-892499<br>(-)                 | Modified<br>CC1G_13704T0<br>( <i>b2-2</i> ) | 2653400-2651473 (-)                 |
| -                        | -                                    | CC1G_01828T0<br>( <i>d1-1</i> )             | 2653400-2651473 (-)                 |
| 1181595 ( <i>β-fg2</i> ) | 887425-889480<br>(+)                 | -                                           | -                                   |
| 1137415 ( <i>β-fg1</i> ) | 883864-884895<br>(+)                 | CC1G_01827T0<br>( <i>β-fg</i> )             | <a href="#">2646406-2647545</a> (+) |
| 1181614                  | <a href="#">882720-883653</a><br>(+) | CC1G_01826T0                                | <a href="#">2645288-2646234</a> (+) |
| 1094996 ( <i>glgen</i> ) | <a href="#">879120-882345</a><br>(+) | CC1G_01825T0                                | <a href="#">2641261-2644545</a> (+) |
| 1094995                  | <a href="#">876725-878971</a><br>(-) | CC1G_01824T0                                | <a href="#">2638742-2641057</a> (-) |
| 1103148 ( <i>blac2</i> ) | <a href="#">874323-876620</a><br>(+) | -                                           | -                                   |
| 1160308 ( <i>mad2</i> )  | <a href="#">873029-874228</a><br>(-) | CC1G_01823T0                                | <a href="#">2637048-2637945</a> (-) |
| 1165929 ( <i>snx4</i> )  | <a href="#">871257-873344</a><br>(+) | CC1G_01822T0                                | <a href="#">2634949-2636783</a> (+) |

|                              |                                      |                                                |                                     |
|------------------------------|--------------------------------------|------------------------------------------------|-------------------------------------|
| 1031396 ( <i>up12</i> )      | <a href="#">868800-871138</a><br>(-) | CC1G_01821T0                                   | <a href="#">2632303-2634830</a> (-) |
| 1031395 ( <i>rpb2</i> )      | <a href="#">864573-868430</a><br>(+) | CC1G_13703T0<br>(two genes fused to one model) | <a href="#">2626696-2631959</a> (+) |
| 1120344 ( <i>up13</i> )      | <a href="#">862870-864414</a><br>(+) |                                                |                                     |
| 1165927 ( <i>fmnor1</i> )    | <a href="#">860988-862678</a><br>(-) | CC1G_01818T0                                   | <a href="#">2624916-2626437</a> (-) |
| 1181620 ( <i>qdr1</i> )      | <a href="#">858946-860793</a><br>(+) | -                                              | -                                   |
| 1103133 ( <i>ndse</i> )      | <a href="#">857528-858720</a><br>(+) | CC1G_01817T0                                   | <a href="#">2623644-2624843</a> (+) |
| 1153345 ( <i>upa4</i> )      | <a href="#">855520-857395</a><br>(+) | CC1G_01816T0                                   | <a href="#">2621439-2623236</a> (+) |
| 1024634                      | <a href="#">853801-855409</a><br>(-) | CC1G_01815T0                                   | <a href="#">2619103-2621082</a> (-) |
| 213701                       | <a href="#">850192-853206</a><br>(+) | CC1G_01814T0                                   | <a href="#">2615859-2618928</a> (+) |
| 1165924                      | <a href="#">849031-850133</a><br>(+) | CC1G_01813T0                                   | <a href="#">2614502-2615625</a> (+) |
| 1153341                      | <a href="#">845123-848866</a><br>(-) | CC1G_01812T0                                   | <a href="#">2610634-2614222</a> (-) |
| 1094983                      | <a href="#">840285-843205</a><br>(+) | CC1G_01811T0                                   | <a href="#">607625-2610066</a> (+)  |
| 1024630                      | <a href="#">838934-839727</a><br>(+) | CC1G_01810T0                                   | <a href="#">2606242-2607178</a> (+) |
| 1120321 ( <i>cwc25</i> )     | <a href="#">837108-838693</a><br>(-) | CC1G_01809T0                                   | <a href="#">2604610-2606051</a> (-) |
| 1137404( <i>lim15/dmc1</i> ) | <a href="#">836248-837091</a><br>(-) | CC1G_01808T0                                   | <a href="#">2602748-2604371</a> (-) |
| 1165918 ( <i>RNAb30</i> )    | <a href="#">833488-834784</a><br>(-) | -                                              | -                                   |
| 1165917 ( <i>hst3</i> )      | <a href="#">830976-833064</a><br>(-) | -                                              | -                                   |
| 61363 ( <i>rp6</i> )         | <a href="#">829899-830250</a><br>(+) | CC1G_01807T0                                   | <a href="#">2601740-2602693</a> (+) |

|         |                                      |              |                                     |
|---------|--------------------------------------|--------------|-------------------------------------|
| 1094976 | <a href="#">824356-828040</a><br>(-) | CC1G_01806T0 | <a href="#">2597092-2600714</a> (-) |
| -       | -                                    | CC1G_01805T0 | <a href="#">2595167-2596736</a> (+) |
| 1153333 | <a href="#">821738-823496</a><br>(+) | CC1G_01804T0 | <a href="#">2592521-2594140</a> (+) |
| 1072421 | <a href="#">820710-821631</a><br>(+) | CC1G_13702T0 | <a href="#">2591415-2592320</a> (+) |
| 1120304 | <a href="#">819167-820691</a><br>(+) | CC1G_01803T0 | <a href="#">2589970-2591279</a> (+) |
| 1145648 | <a href="#">817392-818862</a><br>(-) | CC1G_01802T0 | <a href="#">2588157-2589877</a> (-) |
| 1094972 | <a href="#">815356-817579</a><br>(+) | CC1G_01801T0 | <a href="#">2586076-2588027</a> (+) |
| 1044354 | <a href="#">813756-814924</a><br>(+) | CC1G_01800T0 | <a href="#">2584273-2585762</a> (+) |
| 1120294 | <a href="#">812245-813487</a><br>(-) | CC1G_01799T0 | <a href="#">2582928-2584111</a> (-) |
| -       | -                                    | CC1G_01798T0 | <a href="#">2581293-2582126</a> (+) |
| 1072934 | <a href="#">810638-812175</a><br>(+) | CC1G_01797T0 | <a href="#">2578317-2579859</a> (+) |
| 1165910 | <a href="#">809176-810262</a><br>(-) | CC1G_01796T0 | <a href="#">2576916-2577993</a> (-) |
| 1103082 | <a href="#">807160-808228</a><br>(-) | CC1G_01795T0 | <a href="#">2575851-2576750</a> (-) |
| 1165908 | <a href="#">802076-804569</a><br>(-) | CC1G_01794T0 | <a href="#">2572983-2575510</a> (-) |
| 1153321 | <a href="#">797672-802037</a><br>(+) | CC1G_13701T0 | <a href="#">2568876-2572693</a> (-) |
| 1153320 | <a href="#">795950-797603</a><br>(-) | CC1G_01791T0 | <a href="#">2567390-2568674</a> (-) |
| 213648  | <a href="#">794661-796492</a><br>(+) | CC1G_01790T0 | <a href="#">2564978-2566678</a> (+) |
| 1165904 | <a href="#">793411-794430</a><br>(-) | CC1G_01789T0 | <a href="#">2562478-2563426</a> (-) |

|                         |                                      |                                 |                                     |
|-------------------------|--------------------------------------|---------------------------------|-------------------------------------|
|                         |                                      | CC1G_01788T0                    | <a href="#">2561151-2562077</a> (-) |
| 1120267                 | <a href="#">791196-793007</a><br>(-) | CC1G_01787T0                    | <a href="#">2559457-2561006</a> (-) |
| 1165902                 | <a href="#">788993-790798</a><br>(-) | CC1G_01786T0                    | <a href="#">2557814-2558980</a> (-) |
| 1103060                 | <a href="#">787718-789588</a><br>(+) | CC1G_01785T0                    | <a href="#">2556370-2557695</a> (+) |
| 1165901 ( <i>gpd</i> )  | <a href="#">785731-787605</a><br>(-) | CC1G_01784T0                    | <a href="#">2554397-2556162</a> (-) |
| 147399                  | <a href="#">783211-785503</a><br>(-) | CC1G_01783T0                    | <a href="#">2551954-2554178</a> (-) |
| 1103054                 | <a href="#">780120-782052</a><br>(-) | -                               | -                                   |
| 1103058 ( <i>ade8</i> ) | 776958-779907<br>(+)                 | CC1G_01782T0<br>( <i>ade8</i> ) | 2548109-2551563 (+)                 |

## References

- Niculita-Hirzel H, Labbe J, Kohler A, le Tacon F, Martin F, Sanders IR, Kues U. 2008.** Gene organization of the mating type regions in the ectomycorrhizal fungus *Laccaria bicolor* reveals distinct evolution between the two mating type loci. *New Phytologist* **180**(2): 329-342.
- Spit A, Mellor EJC, Casselton LA. 1998.** A role for heterodimerization in nuclear localization of a homeodomain protein. *Proc. Natl. Acad. Sci, USA* **95**: 6228-6233.
